# Supplementary material for: Kalman/Map Filtering-Aided Fast Normalized Cross Correlation-Based Wi-Fi Fingerprinting Location Sensing
Source: MDPI journal article supplement (doi:10.3390/s131115513), 2013-11-13
Supplement: s1 [file s1]

*Note:*

Due to print error:

On page 15517, Table 1, line 2, there is an additional “ $L$ ”. “ $LL$ ” should be “ $L$ ”.

On page 15525, Table 3, the Square Root of NCC with Equation (1) should be “ $2L$ ”, not “ $L$ ”.
